# Supplementary material
Source: PubMed Central journal article supplement (PMC6643762)
Supplement: ao7b00759_si_001.pdf [file ao7b00759_si_001.pdf]

**Supporting information**

**Antimicrobial Properties of Copper doped ZnO Coatings Under Darkness and  
White Light Illumination**

Iman A. Hassan<sup>a</sup>, Sanjayan Sathasivam<sup>a</sup>, Sean P. Nair<sup>c</sup>, and Claire J. Carmalt<sup>a\*</sup>

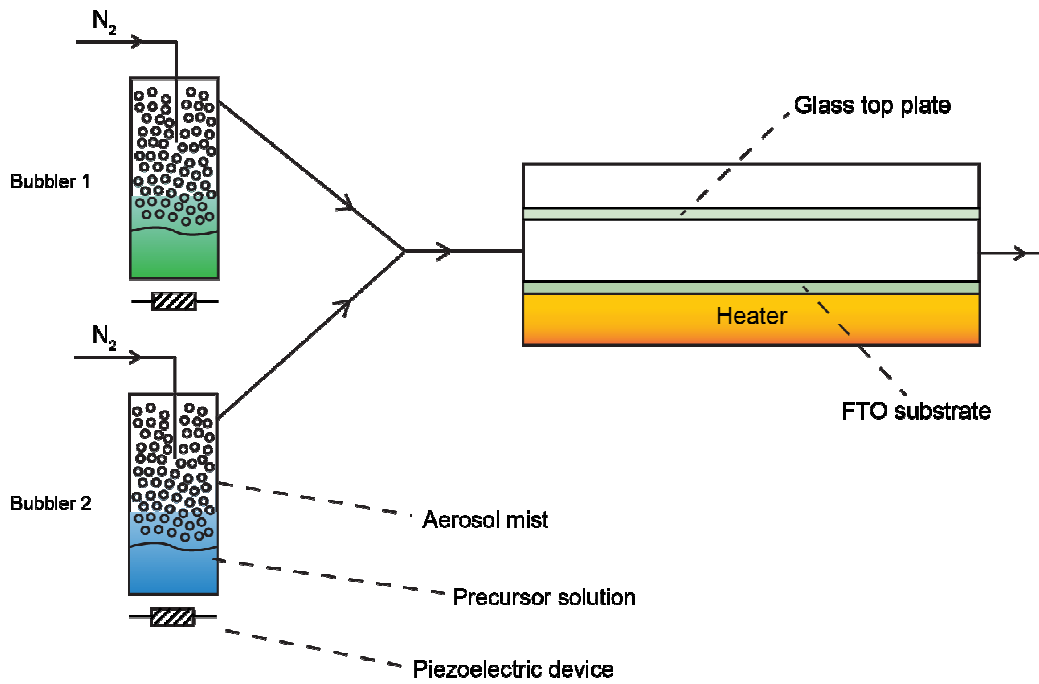

Figure S1: A schematic of the AACVD reactor used to coat glass substrates with ZnO and Cu doped ZnO.

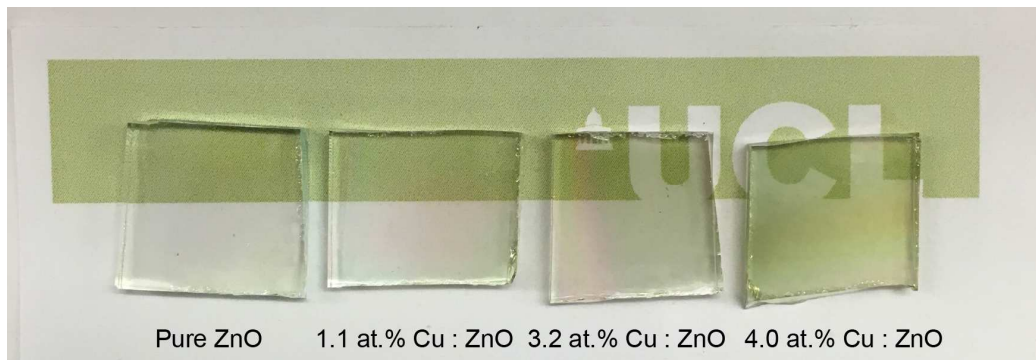

Figure S2: Photographs of the pure and Cu doped ZnO thin films showing high transparency in the visible.

**Table S1: EDS results for the Cu doped ZnO films.**

|         | Cu / at.% |        |        |         | Zn / at.% |        |        |         |
|---------|-----------|--------|--------|---------|-----------|--------|--------|---------|
|         | Area 1    | Area 2 | Area 3 | Average | Area 1    | Area 2 | Area 3 | Average |
| 2 mol.% | 0.64      | 0.78   | 1.88   | 1.08    | 99.36     | 99.22  | 98.12  | 98.92   |
| 4 mol.% | 2.38      | 3.50   | 3.99   | 3.24    | 97.62     | 96.50  | 96.01  | 96.76   |
| 8 mol.% | 3.36      | 3.89   | 5.13   | 3.99    | 96.64     | 96.11  | 94.87  | 96.01   |
